# Supplementary material for: Modelling heterogeneity in the classification process in multi‐species distribution models can improve predictive performance
Source: PubMed Central journal article supplement (PMC10918728; doi:10.1002/ece3.11092), 2024-03-07
Supplement: ECE3-14-e11092-s001.pdf [file ECE3-14-e11092-s001.pdf]

# Supplementary Information One (S1) for 'Modelling heterogeneity in classification process in multi-species distribution models improves predictive performance.'

Kwaku Peprah Adjei<sup>1,2,5</sup>, Anders Finstad<sup>2,3</sup>, Wouter Koch<sup>2,4</sup>, Robert B. O'Hara<sup>1,2</sup>

<sup>1</sup>Department of Mathematical Sciences, Norwegian University of Science and Technology, Norway

<sup>2</sup>Center for Biodiversity Dynamics, Norwegian University of Science and Technology, Norway

<sup>3</sup>Department of Natural History, Norwegian University of Science and Technology, Norway

<sup>4</sup>Norwegian Biodiversity Information Center, Trondheim, Norway

<sup>5</sup>Norwegian Institute for Nature Research, Trondheim, Norway

## 1 **Representation of Equation (2) and (3).**

2 We want to show the relationship between the linear predictor and the classification probabilities defined  
3 in equations (2) and (3) in the multinomial logit model. Given the data with  $c = 1, 2, \dots, C + 1$  categories,  
4 Fahrmeir et al. (2013) defined the multinomial logit model as described below

$$\log\left(\frac{\pi_c}{\pi_{C+1}}\right) = X'\beta, \quad (1)$$

5 where  $\pi_c$  is the probability of observing category  $c$ ,  $\pi_{C+1}$  is the probability of observing reference category  
6  $C + 1$ ,  $\beta$  is a vector of coefficients and  $X$  is the design matrix.

7 Let us define  $k'$  as the reference reported state, for  $k' \in \{1, 2, \dots, K\}$ . Given the definition of the linear  
8 predictor in equation (2) in the main paper, then the probability of classifying true state  $j$  as  $k$  with reference

9 to reported state  $K$  is:

$$\begin{aligned}
\frac{\Omega_{jks}}{\Omega_{jKs}} &= \frac{\exp(\zeta_{jks})}{\exp(\zeta_{jKs})} \\
&= \frac{\exp\left(\omega_{0jk} + \sum_{p=1}^n z_{ps}\omega_{pjk}\right)}{\exp\left(\omega_{0jK} + \sum_{p=1}^n z_{ps}\omega_{pjK}\right)} \\
&= \exp\left(\omega_{0jk} - \omega_{0jK} + \sum_{p=1}^n z_{ps}(\omega_{pjk} - \omega_{pjK})\right) \\
\implies \ln\left(\frac{\Omega_{jks}}{\Omega_{jKs}}\right) &= (\omega_{0jk} - \omega_{0jK}) + (\omega_{1jk} - \omega_{1jK}) * z_{1s} + \dots + (\omega_{njk} - \omega_{njK}) * z_{ns};
\end{aligned} \tag{2}$$

10 which is the same as the multinomial logit model defined in equation (1).

## 11 **References**

- 12 Fahrmeir, L., Kneib, T., Lang, S. and Marx, B. (2013) *Categorical Regression Models*, 325–347. Berlin,  
13 Heidelberg: Springer Berlin Heidelberg. URL: [https://doi.org/10.1007/978-3-642-34333-9\\_6](https://doi.org/10.1007/978-3-642-34333-9_6).
